# Supplementary material
Source: Springer Nature journal article supplement (https://www.springermedizin.de/resource/supplementary/12947_2008_238_MOESM5_ESM.pdf/9556524)
Supplement: MOESM5 [file 9556524]

**LV diastolic  
analysis in CF  
patients**

**Relaxation**

**Filling  
Pressure**

**Compliance**

**Consider AV Remodeling**

**LV mass  
index**

**LV  
Remodeling  
pattern**

**LA  
Diameter**

**LA  
volume  
index**
